# Supplementary material for: Modulation of the monomer-dimer equilibrium and catalytic activity of SARS-CoV-2 main protease by a transition-state analog inhibitor
Source: PubMed Central journal article supplement (PMC8888643; doi:10.1038/s42003-022-03084-7), 2022-03-01
Supplement: 42003_2022_3084_MOESM2_ESM.pdf [file 42003_2022_3084_MOESM2_ESM.pdf]

## **Description of additional supplementary files**

**File name:** Supplementary data 1

**Description:** Source data for all main figures

**File name:** Supplementary data 2

**Description:** Source data for all supplementary information figures
